# Supplementary material for: Three-dimensional graphene networks and reduced graphene oxide nanosheets co-modified dye-sensitized solar cells
Source: Royal Society of Chemistry journal article supplement (doi:10.1039/c7ra09135d), 2017-01-01
Supplement: c7ra09135d1.pdf [file c7ra09135d1.pdf]

# Three-dimensional graphene networks and reduced graphene oxide nanosheets co-modified dye-sensitized solar cells

Bo Tang\*, Guojian Ji, Zhengwei Wang, Haiqun Chen\*, Xufei Li, Haogang Yu, Sen Li, Hong Liu  
*School of Petroleum Engineering, Changzhou University, Changzhou city 213016, China*  
Corresponding author: Tel./fax: +86 519 83295530. E-mail: tangbo@cczu.edu.cn, chenhq@cczu.edu.cn

## 1. Calculation of graphene size and defect density

Raman spectroscopy is one of non-destructive tools to obtain the thickness, average size and defect density of the graphene samples. The average size of graphene sheets can be calculated by following equation [1, 2].

$$L_a = 43.5 \times \frac{I_G}{I_D} \quad (1)$$

Defect density can be roughly defined as  $(1/L_a)^2$  in  $\text{cm}^{-2}$  [3-5]. Based on the ratio of  $I_D/I_G$  of the RGO nanosheets (0.53), the average size is ~80 nm. Similarly, based on the value of  $I_D/I_G$  (0.16), the defect densities of the 3DGN is  $1.36 \times 10^9 \text{ cm}^{-2}$ .

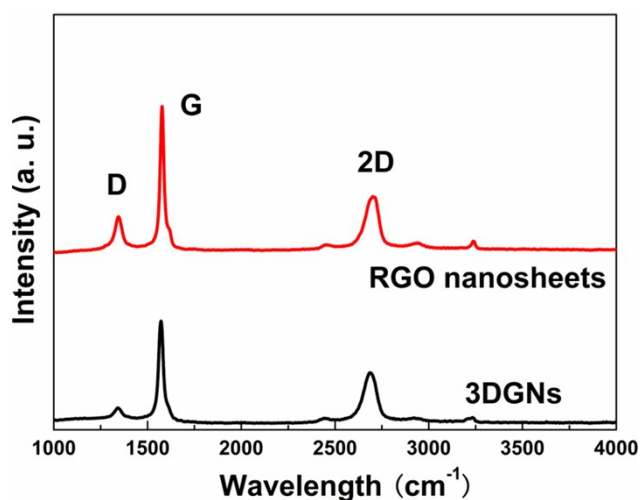

Fig. S1 Raman curves of the adopted RGO nanosheets and 3DGN.

## 2. Electrical structure of dye molecules, TiO<sub>2</sub>, graphene and conductive substrate

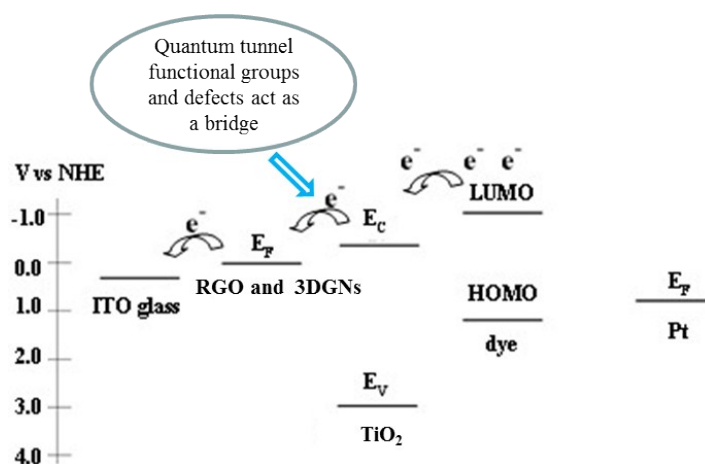

Fig. S2 Schematic diagram of electron transport in the whole photoanode system.

## 3. Preparation of transport layer

The beforehand RGO nanosheets and TiO<sub>2</sub> nanosheets were handled by LBL self-assembly technology to prepare the transport layer [6, 7]. Briefly, a conductive glass (coating ITO) was immersed into a protonic Polyethyleneimine (PEI) aqueous solution for 15 min to introduce positive charges, and followed by washing with deionized water for 2 times (step 1). Afterwards, the conductive glass was immersed into a colloidal suspension of the TiO<sub>2</sub> nanosheets solution for 15 min and then washed for 2 times (step 2). After that, the sample was immersed into the PEI solution for 15 min and rinsed for 2 times (step 3). The resulted sample was immersed into a graphene nanosheets solution for 15 min and washed for 2 times (step 4). The steps 1-4 were repeated until the desired number

of the bi-layer was obtained.

## References

- [1] B. Tang, H. Y. Gao, G. X. Hu, Growth mechanism and influences from kinetic factors on carbon materials with Cu and silica substrates during atmospheric pressure chemical vapour deposition, *J. Phys. Chem. C*. 2013, **117**, 25175-25184.
- [2] G. X. Hu, B. Tang, X. Min, Synthesis and characterization of alternated (humic acid/Fe<sup>3+</sup>)<sub>n</sub> multilayer film on alumina fiber, *Surf. Coat. Technol.* 2012, **206**, 3586–3594.
- [3] J. H. Chen, W. G. Cullen, C. Jang, M. S. Fuhrer, E. D. Williams, Defect scattering in grapheme, *Phys. Rev. Lett.* 2009, **102**, 236805-236809.
- [4] L. G. Cancado, K. Takai, T. Enoki, M. Endo, Y. A. Kin, H. Mizusaki, A. Jorio, L. N. Coelho, P. R. Magahaes, M. A. Pimenta, General equation for the determination of the crystallite size La of nanographite by Raman spectroscopy. *Appl. Phys. Lett.* 2006, **88**, 163106-163108.
- [5] J. Y. Hwang, C. C. Kuo, L. C. Chen, K. H. Chen, Correlating defect density with carrier mobility in large-scaled grapheme films: Raman spectral signatures for the estimation of defect density. *Nanotechnology* 2010, **21**, 465705-465710.
- [6] B. Tang, G. X. Hu, Two kinds of graphene-based composites for photoanode applying in dye-sensitized solar cell. *J. Power Sources*, 2012, **220**, 95-102.
- [7] Y. F. Sun, Y. C. Cao, W. Q. Huang, B. Tang, High-performance photoanode for dye sensitized solar cells with graphene modified two-layer construction. *Mater. Lett.*,

2016, **165**, 178-180.
